# 1 **The Role of Modelling and Analytics in South African COVID-19 Planning and Budgeting**

2 Gesine Meyer-Rath<sup>1,2\*</sup>, Rachel A Hounsell<sup>3,4</sup>, Juliet RC Pulliam<sup>5</sup>, Lise Jamieson<sup>1,6</sup>, Brooke E  
3 Nichols<sup>1,2,6,7</sup>, Harry Moultrie<sup>8</sup>, Sheetal P Silal<sup>3,4</sup>

4 <sup>1</sup> Health Economics and Epidemiology Research Office, Department of Internal Medicine, School of Clinical  
5 Medicine, Faculty of Health Sciences, University of the Witwatersrand, Johannesburg, South Africa

6 <sup>2</sup> Department of Global Health, School of Public Health, Boston University, Boston, MA, USA

7 <sup>3</sup> Modelling and Simulation Hub, Africa, Department of Statistical Sciences, University of Cape Town, Cape  
8 Town, South Africa

9 <sup>4</sup> Centre for Tropical Medicine and Global Health, Nuffield Department of Medicine, University of Oxford,  
10 Oxford, UK

11 <sup>5</sup> South African DSI-NRF Centre of Excellence in Epidemiological Modelling and Analysis (SACEMA),  
12 Stellenbosch University, Stellenbosch, South Africa

13 <sup>6</sup> Department of Medical Microbiology, Amsterdam University Medical Center, Amsterdam, the Netherlands

14 <sup>7</sup> Foundation for Innovative New Diagnostics, Geneva, Switzerland

15 <sup>8</sup> National Institute for Communicable Diseases (NICD), a division of the National Health Laboratory Service,  
16 Johannesburg, South Africa

17

18 \*Corresponding author: Gesine Meyer-Rath ([gesine@bu.edu](mailto:gesine@bu.edu))

19 **Running head:** Modelling the South African COVID-19 Epidemic: Process and results

20 **Keywords:**

21 **Word count:** Abstract: 327 (of 300-500 words); main text: 5700 (w/o tables; tables: 835)

22

## 23 **ABSTRACT**

### 24 **Background**

25 The South African COVID-19 Modelling Consortium (SACMC) was established in late March 2020 to  
26 support planning and budgeting for COVID-19 related healthcare in South Africa. We developed  
27 several tools in response to the needs of decision makers in the different stages of the epidemic,  
28 allowing the South African government to plan several months ahead of time.

### 29 **Methods**

30 Our tools included epidemic projection models, several cost and budget impact models, and online  
31 dashboards to help government and the public visualise our projections, track case development  
32 and forecast hospital admissions. Information on new variants, including Delta and Omicron, were  
33 incorporated in real time to allow the shifting of scarce resources when necessary.

### 34 **Results**

35 Given the rapidly changing nature of the outbreak globally and in South Africa, the model  
36 projections were updated regularly. The updates reflected 1) the changing policy priorities over the  
37 course of the epidemic; 2) the availability of new data from South African data systems; and 3) the  
38 evolving response to COVID-19 in South Africa such as changes in lockdown levels and ensuing  
39 mobility and contact rates, testing and contact tracing strategies, and hospitalisation criteria.

40 Insights into population behaviour required updates by incorporating notions of behavioural  
41 heterogeneity and behavioural responses to observed changes in mortality. We incorporated these  
42 aspects into developing research for the third wave and developed additional methods to integrate  
43

43 allowed us to forecast required inpatient capacity. Finally, real-time analyses of the most important  
44 characteristics of the Omicron variant first identified in South Africa in November 2021 allowed us to  
45 advise policymakers early in the fourth wave that a relatively lower admission rate was likely.

#### 46 **Conclusion**

47 The SACMC's models, developed rapidly in an emergency setting and regularly updated with local  
48 data, supported national and provincial government to plan several months ahead of time, expand  
49 hospital capacity when needed, allocate budgets, and procure additional resources where possible.  
50 Across four waves of COVID-19 cases, the SACMC continued to serve the planning needs of the  
51 government, tracking waves and supporting the national vaccine rollout.

52

53

## 54 INTRODUCTION

55 To date, South Africa has experienced four waves of COVID-19, with an official tally of more than  
56 3,711,000 cases and 101,000 reported deaths as of May 2022 [1]. The country reported its first  
57 imported COVID-19 case on 5 March 2020, with subsequent rapid spread into all districts in the  
58 country. In response, the South African government implemented a five-level COVID-19 alert system,  
59 beginning with a full lockdown (Level 5) from late March 2020 [2]. The alert levels determine the  
60 extent of restrictions to be applied during the national state of disaster, which was initiated in March  
61 2020 and ended two years later, in April 2022 [2]. The risk-adjusted approach was guided by several  
62 criteria, including numbers of infections and rate of transmission, health facility capacity, the extent  
63 of the implementation of public health and social measures (PHSM), as well as the economic and  
64 social impact of continued restrictions [2].

65 The South African COVID-19 Modelling Consortium (SACMC) was established at the end of March  
66 2020 in response to a request by the South African National Department of Health (NDOH) to project  
67 the spread of the disease to support policy and planning in South Africa over the course of the  
68 epidemic. The consortium developed two models to project incidence, deaths, need for hospital  
69 beds at different levels of care, and the corresponding resources required. The models incorporated  
70 available data on COVID-19 cases, severity, and mortality, and served to inform the public and a  
71 range of decision makers, including the Ministerial Advisory Committee on COVID-19 (MAC) advising  
72 the Minister of Health, staff in the NDOH and National Treasury, officials in the provincial  
73 departments of health, and the private health sector.

74 This paper describes the 2-year process of continuously updating the models while collaborating  
75 with the diverse partners, and gives an overview of the model results and the consortium's  
76 recommendations at the different stages of the South African COVID-19 epidemic. The aim is to  
77 highlight the dynamic, multidisciplinary nature of policy-driven modelling of an emergency in a  
78 country with severely constrained resources. A full description of the models developed during wave  
79 1 is provided in [3], and our analysis of COVID-19 related hospitalisations in [4].

80

## 81 METHODS

### 82 The South African COVID-19 Modelling Consortium

83 The SACMC is a group of researchers from academic, non-profit, and government institutions across  
84 South Africa. Established in late March 2020 by the NDOH, its mandate is to provide, assess, and  
85 validate model projections to be used for planning purposes by the Government of South Africa. The  
86 SACMC's work is coordinated by the South African National Institute for Communicable Diseases  
87 (NICD), which maintains the datasets used by the SACMC's models. In addition to its core group of  
88 experienced infectious disease modellers and health economists, the SACMC convenes experts  
89 across a range of disciplines to provide insights, guide the selection of appropriate parameter values,  
90 ensure a close alignment to current clinical practice, and sense-check model outputs.

### 91 Policy-driven modelling

92 Since its establishment in March 2020, the SACMC has provided policy-driven modelling and  
93 analytics support in response to the evolving priorities of decision makers across the different stages  
94 of the epidemic. Several tools were developed and adapted over time to meet these needs. Taken

95 together, these tools supported the South African government at national and provincial levels to  
 96 conduct timely resource planning, shift scarce resources, and implement appropriate PHSM.

97 At the start of the epidemic, the most pressing need was for short- and long-term projections of  
 98 COVID-19 cases, including the number of severe and critical cases requiring hospital admission, and  
 99 deaths under different PHSM scenarios. To fulfil these needs, the SACMC developed the National  
 100 COVID-19 Epi Model (NCEM), a compartmental transmission model following a generalised  
 101 Susceptible-Exposed-Infectious-Removed structure that accounts for disease severity  
 102 (asymptomatic, mild, severe, and critical cases) and treatment pathways (outpatient, inpatient non-  
 103 ICU and ICU care) [3].

104 The National COVID-19 Cost Model (NCCM), a companion model, used epidemiological outputs from  
 105 the NCEM on the number of mild, severe and critical cases to project total COVID-19 resource needs  
 106 and the associated impact on the national and provincial health budgets by incorporating  
 107 information on the need for inpatient and outpatient resources (including their baseline availability  
 108 and how to scale availability with the size of the epidemic). Resource projections covered drugs,  
 109 diagnostics, ventilators, oxygen supply, field hospitals and other hospital infrastructure, staffing  
 110 requirements, and additional mortuary space; model extensions included the quantification and cost  
 111 of vaccines under different vaccination scenarios. These projections informed the development of  
 112 resource quantifications and budgets, allowing timely negotiation with manufacturers and  
 113 preparation of contracts for the additional resources anticipated based on precise quantifications,  
 114 with the exact volumes required being regularly updated based on the latest model outputs.

115 As the epidemic progressed, in addition to the ongoing projections described above, priority was  
 116 placed on resurgence monitoring, estimating the impact of relevant emerging variants of concern  
 117 (Beta, B.1.351, which first emerged in South Africa; Delta, B.1.617.2; and Omicron, B.1.1.529, which  
 118 was again first identified in South Africa), and modelling to inform the government’s vaccination  
 119 procurement and rollout strategy. Figure 1 shows the different tools developed over the course of  
 120 the epidemic in South Africa, which are discussed in further detail below, and the timing of their  
 121 main outputs.

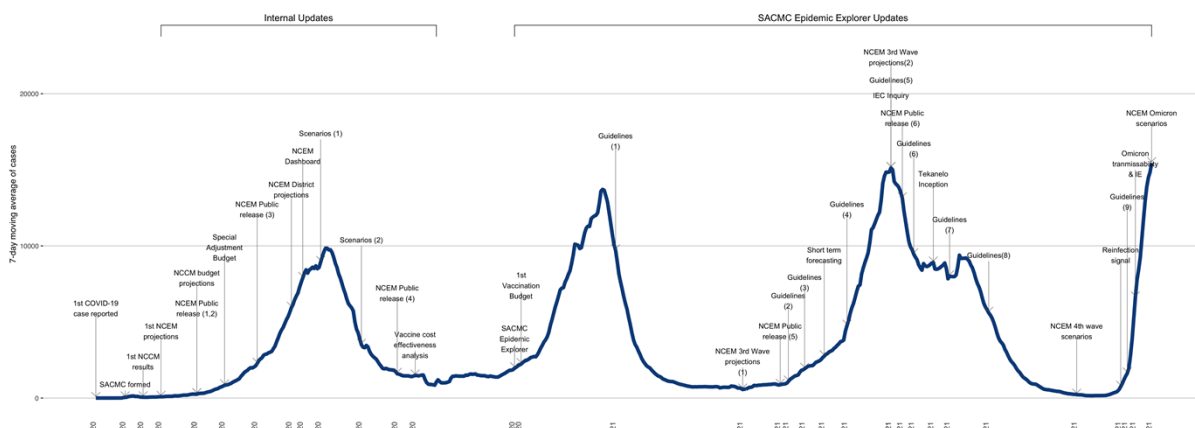

122  
 123 **Fig 1. Select SACMC modelling and analysis contributions: Timeline from March 2020 to December**  
 124 **2021.** See Table S1 for additional information.

125

126

127 **Model users**

128 The SACMC’s modelling outputs have been used by a range of strategic and operational decision  
129 makers (Table 1). Different departments within the NDOH used NCEM outputs for purposes ranging  
130 from the quantification of drug volumes required for inpatient and outpatient care by the Affordable  
131 Medicines Directorate to the estimation of additional mortuary and graveyard spaces by the  
132 Environmental Health Directorate. Private sector initiatives such as the National Ventilator Project,  
133 which sourced ventilation equipment for public and private hospitals in South Africa, used our model  
134 outputs as well. Analysts coordinated by the Reserve Bank, the South African central bank, used  
135 SACMC model outputs to predict the macro-economic impact of the epidemic under different  
136 scenarios.

137 **Table 1: Uses of NCEM and NCCM outputs**

| User                               | Purpose                                    |
|------------------------------------|--------------------------------------------|
| NDOH:                              |                                            |
| Ministerial Advisory Committee     | Policy advice                              |
| Facility Readiness Committee       | Number of beds and expansion of facilities |
| Human Resources for Health team    | Staff required per level                   |
| National Ventilator Project        | Number of ventilators needed               |
| Oxygen planning team               | Oxygen required                            |
| Affordable Medicines Directorate   | Drug quantities                            |
| National Health Laboratory Service | Number of tests and testing priorities     |
| Environmental Health Directorate   | Number of mortuary containers              |
| Provincial DOHs                    | Local planning and resource quantification |
| National Treasury                  | COVID-19 health budgets                    |

138

139 The resurgence monitoring tool was used by planners and technical advisory teams to declare a  
140 resurgence of cases and respond according to the guidelines detailed in the NDOH Resurgence Plan  
141 [5], while the third and fourth wave scenario modelling and short-term forecasts were used  
142 primarily to estimate hospital admissions ahead of a third wave driven by the Delta variant in June  
143 2021, and a fourth wave driven by the Omicron variant in November 2021.

144

145 Outputs of the NCCM and vaccination cost models were used by the National Treasury to make  
146 decisions regarding the additional budget allocation required for COVID-19. Model outputs in part  
147 informed a budget allocation of 1.42 billion USD for COVID-19 specific health care announced by the  
148 South African president at the end of April 2020 [6], most of which was financed through the  
149 reallocation of the existing health budget [7]. Additionally, a group of experienced public finance  
150 specialists was trained to work with provincial Departments of Health to update the model with  
151 provincially specific data, including the baseline availability of resources, prices, and need for  
152 resources that were independent of the course of the epidemic, such as personal protective  
153 equipment and isolation and quarantine facilities.

154 **Key parameters and data sources**

155 The parameter values for the early versions of the NCEM were based on literature and data from  
156 other countries as well as local expert opinion regarding the types, duration, and outcomes of  
157 hospital treatment. Parameter values and assumptions were regularly updated as the scientific  
158 knowledge base on COVID-19 expanded. As South African data became available, parameters were  
159 adjusted to reflect the local context. Parameter selection was guided by ongoing input from  
160 clinicians, virologists, intensive care specialists, immunologists, and epidemiologists on the SACMC.

161 Table 2 juxtaposes the initial set of parameter values from late April 2020 and the updated set from  
 162 September 2020; Table 3 gives an overview of the main data sources.

163 **Table 2: Key NCEM parameter values and their evolution between April and September 2020**

| Parameter                                              | April 2020       |                            | September 2020     |                                                                                                |                     |
|--------------------------------------------------------|------------------|----------------------------|--------------------|------------------------------------------------------------------------------------------------|---------------------|
|                                                        | Value* (range)   | Sources                    | Value* (range)     | Sources                                                                                        |                     |
| <b>Infection severity and transmission**</b>           |                  |                            |                    |                                                                                                |                     |
| Proportion of cases that are asymptomatic              | 75%              | [9-11]                     | 75% (70% - 80%)    | [8-11]                                                                                         |                     |
| Relative infectiousness of asymptomatic cases          | -                | -                          | 80% (77.5%, 82.5%) | [12-14]<br>Estimated through calibration to admissions and fatalities count data (DATCOV) [15] |                     |
| Mild to moderate cases among the symptomatic           | (95.64%, 96.78%) | adjusted based on [17]     | (94.55% - 97.13%)  | Estimated through calibration to admissions and fatalities count data (DATCOV) [15] [16]       |                     |
| Severe cases among the symptomatic                     | (2.46%-3.64%)    |                            | (2.58% - 5.00%)    |                                                                                                |                     |
| Critical cases among the symptomatic                   | (1.16%-1.45%)    |                            | (0.18% - 0.55%)    |                                                                                                |                     |
| Proportion of cases that are fatal                     | (0.30%, 0.412%)  | [17], [18]                 |                    |                                                                                                |                     |
| <b>Timeframes &amp; treatment duration</b>             |                  |                            |                    |                                                                                                |                     |
| Time from infection to onset of infectiousness         | 4 days (2-9)     | [18], [19-23] <sup>1</sup> | 2 days (1-3)       | [24, 25-34] with input from the National COVID-19 Modelling Consortium                         |                     |
| Time from onset of infectiousness to onset of symptoms | 2 days (1-4)     |                            | 4 days (3-5)       |                                                                                                |                     |
| Duration of infectiousness from onset of symptoms      | 5 days           |                            | 5 days (4-6)       |                                                                                                |                     |
| Time from onset of mild symptoms to testing            | 4 days (2-4)     |                            | 4 days (3-5)       |                                                                                                | [25, 26, 18-21, 23] |
| Time from onset of symptoms to hospitalisation         | 5 days (4-8)     |                            | 5 days (4-6)       |                                                                                                |                     |
| Time from onset of symptoms to ICU admission           | 9 days (8-17)    |                            | see below          |                                                                                                |                     |
| Duration of hospital stay                              | 12 days (7-16)   |                            |                    |                                                                                                |                     |
| Duration from ICU admission to discharge               | 18 days (14-18)  |                            |                    |                                                                                                |                     |
| Duration from ICU admission to death                   | 5 days (4-7)     |                            |                    |                                                                                                |                     |
| Time in non-ICU (never ICU) to death/recovery          |                  |                            | 8 days (4-12)      | Lengths of stay: values and ranges sourced from NICD                                           |                     |
| Time in non-ICU for those destined for ICU             |                  |                            | 0 days (0-2)       |                                                                                                |                     |

<sup>1</sup> with additional input from analysis of NICD data

|                                                            |  |  |                 |                                                                    |
|------------------------------------------------------------|--|--|-----------------|--------------------------------------------------------------------|
| Time in ICU for those ventilated and destined to die       |  |  | 14 days (7-27)  | COVID-19 Hospital Sentinel Surveillance database (DATCOV) [15] [4] |
| Time in ICU for those never ventilated and destined to die |  |  | 11 days (7-18)  |                                                                    |
| Time in ICU for those ventilated and recovered             |  |  | 19 days (15-37) |                                                                    |
| Time in ICU for those never ventilated and recovered       |  |  | 5 days (1-10)   |                                                                    |
| Time in non-ICU for those who were in ICU and recovered    |  |  | 0 days (0-6)    |                                                                    |

164

165 **Table 3: Summary of NCEM data sources**

|     |                                                                                                                                               |
|-----|-----------------------------------------------------------------------------------------------------------------------------------------------|
| 166 | National case and hospitalisation data from the South African National Institute for Communicable Diseases                                    |
| 167 | Statistics South Africa projected 2020 district population projections [37]                                                                   |
| 168 | Coronavirus COVID-19 (2019-nCoV) Data Repository for South Africa, Data Science for Social Impact Research                                    |
| 169 | Group @ University of Pretoria [38]                                                                                                           |
| 170 | Vodacom Mobile Event Database                                                                                                                 |
| 171 | Google COVID-19 Community Mobility Reports                                                                                                    |
| 172 | Published and pre-print academic literature (cited in Table 2)                                                                                |
| 173 | Expert input from members of the SA COVID-19 Modelling Consortium, and                                                                        |
| 174 | <a href="https://sacoronavirus.co.za/category/press-releases-and-notice/">https://sacoronavirus.co.za/category/press-releases-and-notice/</a> |
| 175 |                                                                                                                                               |

176 The NCCM used three types of input data: 1) The type and required quantities of resources, such as  
 177 the number of inpatient beds projected by the NCEM, human resources at all care levels, oxygen,  
 178 oxygen delivery devices, SARS CoV-2 tests, infection control and prevention infrastructure; 2) the  
 179 public-sector prices of these resources; and 3) the baseline volume of resources available for the  
 180 COVID-19 health response for all items where the quantities required exceeded existing resource  
 181 levels, such as in the case of hospital beds or ventilators. Costs were evaluated from the provider  
 182 perspective, in this case the South African government. Despite the need to provide COVID-19  
 183 testing and care in both the public and the private sectors, this perspective is appropriate given that  
 184 contracting arrangements were put in place to ensure private-sector services were offered at  
 185 charges similar to public-sector prices. As a result, we used public-sector prices and salaries  
 186 throughout, based on the most recent tariffs and public tenders (Table 4).

187 **Table 4: Summary of NCCM data sources**

| Intervention/ ingredient       | Type of target population         | Data sources      |                 |                   |
|--------------------------------|-----------------------------------|-------------------|-----------------|-------------------|
|                                |                                   | Target population | Cost            | Baseline capacity |
| PPE                            | Healthcare workers at all levels  | DHIS              | Own analysis    | NDOH              |
| ICU beds, staff and linen      | Critically ill cases              | NCEM              | Own analysis    | NDOH              |
| Ventilators                    | Critically ill cases (subset)     | NCEM              | Public tender   | NDOH              |
| Testing                        | All cases who present for testing | Own analysis      | NHLS            | NHLS              |
| Community health workers (CHW) | 10,000                            | DHIS              | Public salaries | -                 |



|                                 |                                  |      |               |      |
|---------------------------------|----------------------------------|------|---------------|------|
| CHW supplies                    | Thermometers for 10,000 CHW      | -    | Public tender | -    |
| Isolation O2                    | Severely + critically ill cases  | NCEM | Own analysis  | -    |
| Hospital beds, staff and linen  | Severely ill cases               | NCEM | Own analysis  | -    |
| Drugs                           | All cases (by level of severity) | NCEM | Own analysis  | -    |
| PHC staff                       | 70% of symptomatic mild cases    | NCEM | Own analysis  | -    |
| Fever clinics                   | NDOH                             | NDOH | NDOH          | -    |
| 30-bed wards                    | NDOH                             | NDOH | NDOH          | -    |
| Mortuary cupboards and cabinets | Deaths by municipality           | NCEM | NDOH          | NDOH |

188

189 **Evolution of modelling purpose, structures, and tools across the epidemic**

190 ***Projections and scenarios for short- and long-term COVID-19 burden***

191 Government set three priorities during the first wave of the COVID-19 epidemic in South Africa: 1) to  
 192 generate short- and long-term projections of COVID-19 cases, estimating the pace at which cases  
 193 might increase and spread between provinces; 2) to project the expected number of severe and  
 194 critical cases leading to hospital admission, as well as estimates of the corresponding resource  
 195 requirements; and 3) to compute the cost of the health sector response to the epidemic at a  
 196 provincial and national level in order to inform the adjustment of the health budget and the flow of  
 197 resources around the country.

198 In order to fulfil the first and second priority, we developed the National COVID-19 Epi Model, a  
 199 compartmental transmission model to estimate the total and reported incidence of COVID-19 in the  
 200 nine provinces (and later, 52 districts) of South Africa. It was designed to simulate the impact of  
 201 different behavioural scenarios, inform resource requirements, and predict where gaps could arise  
 202 based on the available resources within the South African health system. The model follows a  
 203 generalised Susceptible-Exposed-Infectious-Removed (SEIR) structure accounting for disease severity  
 204 (asymptomatic, mild, severe, and critical cases) and the treatment pathway as shown in **Error!**  
 205 **Reference source not found..**



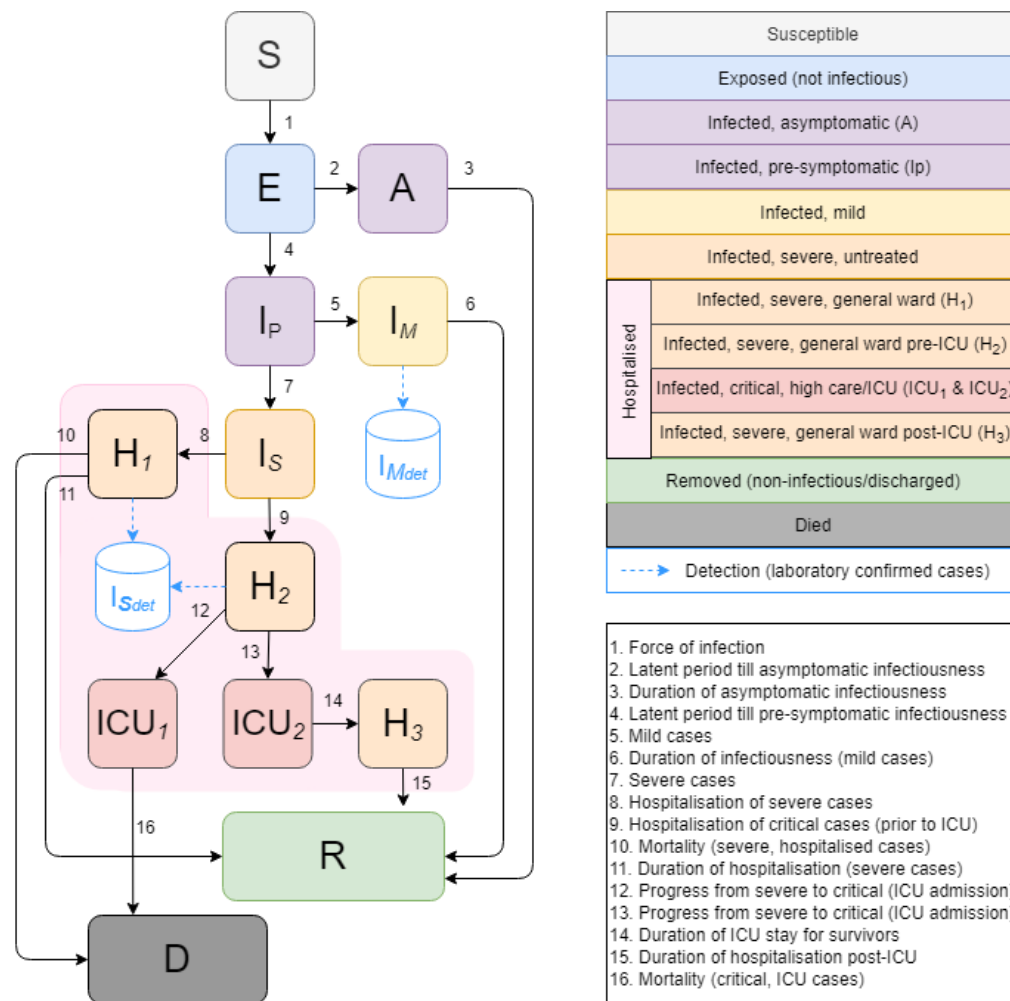

206

207 **Fig 1: Original NCEM model structure (v1)**

208 Version 1 of the NCEM v1, stratified at the provincial level, accounted for the clinical profile of SARS-  
 209 CoV-2 and the hospital care pathway (Figure S1). With limitations on general ward and ICU capacity,  
 210 the model was extended in v2 to account for limited access to hospital level care and restricted  
 211 capacity in wards at a provincial level (Figure S2). With a need for planning support at a finer spatial  
 212 granularity and lifting of restrictions on intra-country travel, a stochastic version of the NCEM (v3)  
 213 was extended to cover the 52 districts of South Africa, linked through a connectivity matrix  
 214 formulated by mobile data over time. NCEM v4 was necessary after the detection of the Beta variant  
 215 in South Africa (Figure S3). The model was further stratified to include 7 age groups across three  
 216 subpopulations of interest: healthcare workers, the population with comorbidities and everyone  
 217 else. Vaccination was included to account for vaccine effectiveness against infection and severity for  
 218 a generic vaccine. In anticipation of another variant and with the vaccination programme being  
 219 implemented for healthcare workers NCEM v5 was developed to include a third variant stratification  
 220 for this hypothetical new variant, which was updated at the beginning of the third wave to represent  
 221 early data on the characteristics of the Delta variant (Figure S4). With NCEM v6, vaccination was  
 222 included in greater detail with specific vaccination types in mind, differentiating between vaccine  
 223 effectiveness in those with prior infection vs the immunologically naïve (Figure S5). Lastly, just  
 224 before the fourth wave the NCEM was once again updated to v7 with a fourth stratification for  
 225 another hypothetical new variant, producing various scenarios driven by different joint assumptions  
 226 regarding its transmissibility and immune escape properties (Figure S6). This version was updated to  
 227 the characteristics of the Omicron variant within days of Omicron being named.

228 The NCEM was originally developed as a deterministic compartmental model, where the  
229 characterisation of uncertainty changed over the course of the pandemic. Early on in the first wave,  
230 when uncertainty in parameter values was large and the least complex framework of the NCEM was  
231 implemented, uncertainty in parameter values was explored through sensitivity analyses and  
232 uncertainty bounds estimated through random draws from specified parameter distributions. When  
233 the need arose to expand the model to a finer spatial granularity in v3, the NCEM was additionally  
234 implemented stochastically to account for greater uncertainty at small geographical levels. The  
235 inclusion of variants and vaccines into NCEM versions 4 onwards brought an additional layer of  
236 uncertainty in projection modelling, and scenario analyses were employed to depict uncertainty in  
237 the outcomes of unknown vaccine and variant characteristics.

### 238 ***Resource planning***

239 The National COVID-19 Cost Model (NCCM) takes inputs from the NCEM and cost inputs based on  
240 data from existing sources that were adapted to represent the type, number and prices of  
241 ingredients required in South Africa's COVID-19 response. It calculates annual budgets for the  
242 NDOH's response to COVID-19, allocating costs at the level of the provinces as well as NDOH,  
243 incremental to existing resources such as hospital beds and staff contingents.

244 The NCCM was updated with new NCEM results whenever they became available and was changed  
245 to incorporate additional interventions when deemed relevant by policy makers and planners (for  
246 example, temporary inpatient infrastructure such as field hospitals and add-on clinic space).  
247 Additional updates included new clinical interventions once they were incorporated into national  
248 COVID-19 management guidelines (such as dexamethasone treatment and high-flow nasal cannulae  
249 treatment), and prices and quantities as new tenders and data on actual resource use became  
250 available. For example, in July 2020 we adjusted our assumptions regarding inpatient length of stay  
251 downwards from the initial estimates based on international literature to results from our analysis  
252 the South African hospital sentinel surveillance database [15] (for more detail regarding the methods  
253 see [4]); and inpatient costs were updated based on a more detailed analysis based on South African  
254 ingredients and prices [41].

### 255 ***Dashboard for disseminating model updates***

256 Between early April and early September 2020, the NCEM was updated frequently, and results made  
257 available to stakeholders within the South African government. Reports on a subset of these updates  
258 were additionally made public. To aid the timely dissemination of projections, we developed an web-  
259 based interactive application, the National COVID-19 Epi Model Dashboard ([https://masha-  
260 app.shinyapps.io/NCEMDashboard](https://masha-app.shinyapps.io/NCEMDashboard)), which visualised the most important NCEM outputs on  
261 projected cases, hospitalisations and deaths. These included active cases and cumulative detected  
262 cases for symptomatic, severe, and critical cases; hospital beds needed and cumulative admissions  
263 for non-ICU, ICU ventilated, and ICU non-ventilated; and cumulative deaths.

### 264 ***Resurgence monitoring***

265 At the beginning of the second wave of COVID-19 cases in September 2020, driven by the Beta  
266 variant which originated in South Africa, resurgence monitoring became a priority. The SACMC  
267 assisted in the development of a set of resurgence metrics to support planners and technical  
268 advisory teams to declare a resurgence or wave and respond according to the guidelines detailed in  
269 the Ministry of Health's resurgence action plan [5]. To facilitate effective communication and  
270 dissemination of these metrics, we developed a second web-based dashboard called the SACMC  
271 Epidemic Explorer in two versions: a sub-district level version to guide planners at all government

272 levels, and a district-level version ([www.SACMCEpidemicExplorer.co.za](http://www.SACMCEpidemicExplorer.co.za)) to inform the public. It  
273 allows users to explore the COVID-19 epidemic in South Africa, analyses resurgence risk, presents  
274 metrics such as estimates of case levels, percentage change in cases and periods of consistent  
275 growth to prepare for future outbreaks, and monitor confirmed COVID-19 hospital admissions and  
276 deaths. We measured the metrics' performance against three main criteria: whether the resurgence  
277 metrics were consistent in their messaging; whether the metrics provided sufficient early warning;  
278 and whether the metrics relaxed the severity of their messaging at a suitable time and pace after the  
279 peak of the epidemic.

### 280 ***Short-term forecasting***

281 Towards the end of the second wave, short term forecasts of COVID-19 cases, hospital admissions,  
282 and of the likelihood of when provinces would meet the third, then fourth wave criterion were  
283 developed in order to improve situational awareness and inform government resource planning.  
284 These two-week case and admission forecasts were updated weekly and three times weekly,  
285 respectively, and displayed on the SACMC Epidemic Explorer for easy access.

286

## 287 **RESULTS**

### 288 **Findings of the National COVID-19 Epi Model (First wave)**

289 In May 2020, using version 1, the model projected an estimated 8.01 and 8.62 million laboratory-  
290 confirmed cases, and 40,223 and 43,759 deaths, in the optimistic and pessimistic scenarios,  
291 respectively, by 1 October. Active cases were estimated to peak in early July in the pessimistic, and  
292 mid-July in the optimistic scenario, with a maximum number of between 72,281 and 77,899 hospital  
293 beds, and 31,656 and 24,150 ICU beds in use at peak. Total cumulative incidence was estimated to  
294 reach between 48.7 and 51.7 million cases (symptomatic or asymptomatic) by 1 October (i.e., an  
295 attack rate of 82-88%), with between 8.01 and 8.62 million detected cases, assuming a detection  
296 factor of 1 in 6 cases. While these projections incorporated a certain level of effectiveness of PHSM  
297 in their scenarios, they underestimated the severity and effect of government restrictions and  
298 population adherence to them and thus assumed that all exposure would happen during a single  
299 wave. A full set of projections for all nine provinces is available in our detailed reports [42, 43].

300 The updates in version 2 that took into account the variation in timing and level of peaks of the  
301 epidemics between the provinces and between the districts in each province resulted in a national  
302 peak in cases at a similar time (i.e., mid-August 2020) to the optimistic scenario from version 1, but  
303 at a lower level. While the model projected a concomitant lower peak in the need for hospital (non-  
304 ICU) and ICU beds at a national level, bed capacity was still expected to be breached or  
305 overwhelmed in all provinces. We noted that increasing capacity to accommodate patients in  
306 hospital could allow the country to better leverage new therapeutic options such as high-flow  
307 oxygen and dexamethasone, which had the potential to improve mortality outcomes.

308 In version 3, we modelled the impact of four behavioural scenarios on the four provinces with the  
309 most advanced epidemics: Western Cape, Eastern Cape, Gauteng and KwaZulu-Natal. When applying  
310 each scenario, we noticed that each in turn led to either earlier and/or lower peaking of cases than  
311 our original projections, with the exception of the scenario in which the behavioural response  
312 threshold was assumed to be 110 deaths per day, which peaked at roughly the same level but  
313 shifted the peak forward slightly in all three provinces. The full analysis detailing the behavioural  
314 scenarios is available in [44].

315 The updated version 4 from early September 2020 estimated that there had been 15.2 million  
 316 infections by September, equating to 25.5% (uncertainty range: 22.0%-28.6%) of the population- a  
 317 much lower first-wave attack rate than estimated in our first version. Under the moderate testing  
 318 scenario, cumulative detected cases were estimated to continue to grow until between 570,000 and  
 319 1.2 million cases by early November (and only marginally so thereafter), depending on testing rates.  
 320 The peak number of general hospital (i.e., non-ICU) beds in use was estimated to have been reached  
 321 in early-August, at around 8,000 beds (when around 12,500 beds would have been needed). The  
 322 peak number of ICU beds in use was estimated to have been reached around the same time, with  
 323 around 1,100 beds- although more than 2,000 beds would have been needed. Total deaths are  
 324 estimated to continue to increase until early November when the cumulative number of all deaths  
 325 would reach 37,000 (of which 16,000 would have been in hospital); thereafter the growth rate was  
 326 estimated to be very low [44].

### 327 Findings of the National COVID-19 Cost Model (First wave)

328 Given the regular updates to the NCCM’s structure and inputs, and the ongoing changes to the  
 329 country’s COVID-19 management policies and clinical guidelines, model results changed almost  
 330 weekly for the duration of the first wave. Amongst the many updates, we report on a version in the  
 331 end of May 2020, which used input from the first NCEM version to inform an additional allocation to  
 332 COVID-19 related healthcare for financial year 2020/21.

333 The NCCM estimated that the budget required for the COVID-19 health response for financial year  
 334 2020/21 would be around 2.1 and 2.7 billion USD under the NCEM’s optimistic and pessimistic  
 335 scenario, respectively (**Error! Reference source not found.**). Scenarios differed in the cost of those  
 336 budget items that were directly linked to the number of projected cases, in particular inpatient care  
 337 (ICU and non-ICU beds, ventilators, and oxygen) and drugs at all levels of the healthcare system. In  
 338 both scenarios, the largest contributor to total cost were the procurement and staffing of additional  
 339 ICU beds (21% and 26%, resp., in the optimistic and pessimistic scenario), personal protective  
 340 equipment (PPE) for healthcare workers at all levels (18% and 14%), and prefabricated facility  
 341 infrastructure discussed at that time, such as additions to primary healthcare clinics for the  
 342 management of non-severe patients (“fever clinics”) (11% and 9%) and 30-bed stand-alone COVID-  
 343 19 wards as additions to hospitals (15% and 12%).

344 **Table 5. The projected COVID-19 health budget for financial year 2020/21**

| Budget item              | Description                                                        | Scenario with 20,000 additional ICU beds |                 |
|--------------------------|--------------------------------------------------------------------|------------------------------------------|-----------------|
|                          |                                                                    | Total cost [millions 2020 USD]           | % of total cost |
| PPE                      | Personal protective equipment for healthcare workers at all levels | 360                                      | 18%             |
| Testing                  | PCR tests only; no new laboratory instruments or extra staff       | 145                                      | 7%              |
| Central functions        | Port Health and surveillance                                       | 23                                       | 1%              |
| Intensive Care Unit beds | incl. additional beds required, linen and staff costs              | 426                                      | 21%             |
| Ventilators              | Additional ventilation equipment required for inpatient care       | 74                                       | 4%              |
| Oxygen                   | Oxygen cylinders for inpatient care, excludes oxygen equipment     | 179                                      | 9%              |

| Budget item           | Description                                                                                                       | Scenario with 20,000 additional ICU beds |                 |
|-----------------------|-------------------------------------------------------------------------------------------------------------------|------------------------------------------|-----------------|
|                       |                                                                                                                   | Total cost [millions 2020 USD]           | % of total cost |
| Hospital beds         | incl. additional beds required, linen and staff costs                                                             | 9                                        | 0%              |
| Drugs                 | at ICU, general wards and primary healthcare clinics                                                              | 211                                      | 10%             |
| PHC staff             | for screening, testing, clinical assessment, post-test follow-up                                                  | 32                                       | 2%              |
| CHW supplies          | 1.1 thermometers per community healthcare worker                                                                  | 7                                        | 0.3%            |
| Isolation facilities  | Upgrading and repurposing of hotel and conference facilities to be used as facilities for isolation of mild cases | 60                                       | 3%              |
| Fever clinics         | 1000 units to be added to primary health centres and community health centres                                     | 218                                      | 11%             |
| 30-bed COVID-19 wards | Attached to existing hospital or to field hospital                                                                | 299                                      | 15%             |
| <b>TOTAL</b>          |                                                                                                                   | <b>2,043<sup>2</sup></b>                 |                 |

345

346 Based on these results, about 1.5 billion USD was added under the COVID-19 Special Adjustment  
 347 Budget in June 2020, funded through a combination of reprioritisation of funds from other  
 348 departments and within the provincial health budgets, and increased lending [7]. Most of this  
 349 budget was used in expenditure on inpatient care and PPE, although over 12 instead of the originally  
 350 estimated 6 months, and allocated slightly differently: Few of the large infrastructure projects were  
 351 implemented, except for the construction of three large field hospitals in the worst-hit provinces, in  
 352 two cases through the repurposing of existing buildings, and with completion so delayed that very  
 353 few patients were admitted. In total fewer ICU beds were added due to severe constraints in the  
 354 trained staff needed to staff them.

### 355 Findings from resurgence modelling, forecasts and scenario modelling (Wave 2 onwards)

356 The resurgence monitoring dashboard provided continuous updates three times a week on the state  
 357 and growth of the epidemic across provinces, districts, and sub-districts from December 2020  
 358 onwards. The metrics on the dashboard classified all areas as being in a state of control, alert or  
 359 response, which triggered a series of actions laid out in a Department of Health workplan [5]. The  
 360 short-term forecasts provided two-week forecasts on the trajectory of cases and admissions at the  
 361 provincial level from May 2021 on, and placed these projections within the context of the  
 362 relationship between weekly admissions and hospital-based case fatality rates that was seen in prior  
 363 waves, with one notable exception: At the beginning of the fourth, Omicron, wave, we did not  
 364 provide admissions forecasts, due to uncertainty regarding the relationship between cases and  
 365 admissions under this novel variant.

366

367 The scenario modelling for the third wave which accounted for province-level data on  
 368 seroprevalence and the dominance of new variants estimated that across most provinces and  
 369 behavioural scenarios, the peak admissions of the third wave would be lower than that of the  
 370 second wave. We however saw that a slow, weak behavioural response would increase admissions

<sup>2</sup> Not all of these components were necessarily supported or included in the allocations made, with final allocations to the health response in the order of USD1.5 billion.



371 for severe or critical COVID-19 cases across most age groups. Younger age groups were expected to  
372 have fewer admissions than in the second wave in most scenarios. Our analysis by province showed  
373 substantial variation of the size of the third wave between provinces, reflective of different age  
374 distributions, seroprevalence and prevalence of comorbidities, with the third wave being highest in  
375 more urban provinces, due to the higher concentration of working-age adults and people with co-  
376 morbidities. Across provinces, the time from an initial increase in transmission to the peak was  
377 estimated to be on average 2-3 months. A full report detailing scenario projections for each of the  
378 nine provinces is available in [45, 46].

379

380 Lastly, our scenarios for the fourth wave projected that, across a large range of assumptions  
381 regarding immune escape properties and transmissibility a hypothetical new variant, loss of  
382 protection against severe infection, and increase in contacts, hospital admissions during the 4th  
383 wave would be less than during the 3rd wave, given high population levels of combined immunity  
384 from, in particular, previous infection and, to a lesser extent, vaccination (owing to low vaccine  
385 coverage at the time). This remained true in our updated sets of scenarios incorporating the higher  
386 transmissibility and immune evasion properties of Omicron compared to previous variants.

387

## 388 DISCUSSION

389 The process of providing policy-relevant research on the evolution and impact of an aggressive novel  
390 pathogen required a relevant, timely and responsive modelling approach; ongoing re-assessment of  
391 the availability of local and international data and evidence; and effective, transparent navigation of  
392 uncertainty. Through our experience providing modelling and analytics support throughout the  
393 COVID-19 epidemic in South Africa, we learned the following lessons:

394 **The modelling approach needs to be relevant and responsive to evolving policy priorities.** Over the  
395 course of the epidemic, the type of questions that are most important to decision makers changes.  
396 Modellers need to work closely with model users so that the outputs developed are relevant and  
397 timely, serving the dynamic needs of the user. Further, establishing strong relationships and  
398 embedding continuous engagement with stakeholders throughout the modelling process is  
399 fundamental to accelerating the incorporation of modelling output into decision making. In South  
400 Africa, policy needs changed from long term projections of the shape and peak of the first wave, to  
401 modelling of the impact of behaviour to explain diversions from expectation, to real-time resurgence  
402 monitoring during the ensuing waves (each driven by a new variant), incorporating all previous  
403 learnings into third wave projections (alongside two-week forecasts of hospital-relevant data),  
404 providing scenarios that included a potential novel variant with immune escape properties just  
405 ahead of the fourth wave driven by Omicron, and, finally, updating our fourth wave scenarios with  
406 the results of our own rapid-fire analysis of Omicron properties within days of the emergence of this  
407 variant. The approach discussed in this paper demonstrates the value of the adaptive nature of our  
408 policy-driven modelling work.

409 **Modellers need to be flexible in the tools they apply.** At different stages of the epidemic, the  
410 varying availability of data and most pressing policy questions should inform the selection of an  
411 appropriate modelling or analytics approach. Short-term modelling can account for rapid and  
412 frequent changes, quickly incorporating new data, and enabling short lead time between updates  
413 and communication of findings. This is particularly relevant for important but rapidly changing inputs  
414 such as available hospital capacity, which has been difficult to estimate throughout the epidemic as  
415 facility capacity changed regularly. [42-44]. Additionally, we realised that, while our initial  
416 projections had intentionally projected the number of beds *needed* without taking capacity

417 constraints into account, as well as the cost of providing oxygen and other resources to all critical  
418 cases, the actual capacity to accommodate severe and critical cases was much lower, leading to the  
419 addition of outputs (including budgets) based on actual bed use. The ability to project both of these  
420 during the first wave, in addition to predicting the extent of the health burden across provinces  
421 during the third and fourth waves, and monitor resurgence patterns and bed occupancy at the sub-  
422 district level, were possibly amongst our most useful contributions. However, even these outputs'  
423 usefulness was limited by the non-fungibility of healthcare resources in many instances: The  
424 strongest constraint on inpatient bed availability was human resources, which could not be easily  
425 shifted and much less created over a short time span. And more than two thirds of deaths happened  
426 outside of hospitals, potentially pointing to COVID-19 patients being disheartened by reports of  
427 locally overwhelmed hospitals [47-49], being turned away by overburdened emergency rooms,  
428 becoming too sick too quickly to seek care in time, or dying in transit where emergency transport  
429 was scarce.

430 We also learned that it is in the hands of the modeller to judge if sufficient data are available and/or  
431 modelling can responsibly support the decisions to be made. Ahead of the second wave in South  
432 Africa in October 2020, model predictions of the shape and timing of the peak of this second wave  
433 were urgently requested. The SACMC decided to first assess the driving forces behind the  
434 resurgence, considering factors such as increased mobility, PHSM fatigue, lower seroprevalence or  
435 new variants. In the absence of additional information at the time (with the Beta variant only  
436 discovered in December 2020), the SACMC made the difficult decision not to produce model-based  
437 projections. Instead, we choose to develop a set of metrics that could detect and monitor the  
438 second wave. Further updates to the NCEM were only resumed in anticipation of the third wave and  
439 the vaccine roll-out programme, once more information was available. And again, at the beginning  
440 of the fourth wave, our use of epidemiological tools such as reinfection analysis [50] allowed us to  
441 quickly produce bounding estimates for Omicron's combined transmissibility and immune escape  
442 properties [51], which in turn provided reliable estimates of bed needs for this wave.

443 **Models should take local context into account.** There are several challenges to modelling in low-  
444 and middle-income countries in general. Data systems and surveillance infrastructure are often  
445 underdeveloped. Constrained resources, especially during health emergencies, lead to overwhelmed  
446 hospital staff who are unable to feed data systems in real time. This can cause delays and errors in  
447 reporting. Heterogeneity in population characteristics and access to health infrastructure are vital  
448 elements in the disease ecosystem and essential inputs to disease models. Infectious disease models  
449 should account for local context such as data availability, health systems dynamics, demography,  
450 contact patterns, acceptability of interventions, and cultural influences. In countries where data  
451 availability is scarce, it is important to understand what adaptations are needed and how models  
452 may perform under different data constraints, and to communicate the resulting uncertainty  
453 effectively. As such, the adaptation of plug-and-play models from resource-rich countries remains  
454 an inferior option, as these are usually ill-equipped to provide reliable, ongoing, real-time decision-  
455 making support tailored to local needs, data and epidemic specifics. One example of this is our mis-  
456 specification of mortality rates in v1 of our model which was a result of a misinterpretation of  
457 international data on case fatality rates- in March/ April, 2020, the only available data [42].  
458 Incidentally, updating the model with locally derived mortality rates after the first South African  
459 wave resulted in very similar, albeit more correct, estimates of the number of overall deaths [44].  
460 Another is our decision to not incorporate the impact of individual PHSM, despite clear and regular  
461 requests from policy makers to help with decisions regarding which individual restrictions would still  
462 be necessary. This decision was taken because, despite regular reviews, we did not find a robust



463 enough dataset applicable to a low- or middle-income setting or South Africa specifically regarding  
464 the impact of these measures.

465 **Communicating uncertainty clearly and transparently is vital when reporting model findings.**

466 Managing expectations regarding the limitations of models, the quality of data and the assumptions  
467 used improves the likelihood of model outputs being used responsibly and appropriately by decision  
468 makers. We used several widely accepted approaches for doing this, including using scenario and  
469 sensitivity analyses, and clearly marked uncertainty ranges for input parameters and results. We  
470 found that uncertainty, while central to our understanding of our role as modellers, was not always  
471 useful to our audience of health planners; especially where additional resources had to be made  
472 available, users opted to use our median estimates in order to inform budgets and order exact  
473 quantities.

474 **CONCLUSION**

475 In developing the NCEM, NCCM, and a number of dashboards and additional outputs such as reports  
476 and briefing materials, the SACMC supported national and provincial government to plan several  
477 months ahead of time, expanding hospital facilities where needed, and procuring additional  
478 resources. As the country is continuing its path towards endemicity, the SACMC continues to serve  
479 the planning needs of the government, tracking the development of cases and admissions and  
480 developing models to further support the national vaccine rollout.

481 Disease modelling was a source of regularly updated scientific evidence for decision making in the  
482 South African epidemic. Whilst much progress was made in developing models rapidly in an  
483 emergency setting, many challenges remain and need to be overcome to incorporate local context,  
484 needs of policymakers and sub-optimal data systems and build disease modelling capacity to better  
485 prepare for future health emergencies.

486 **ACKNOWLEDGEMENTS**

487 The authors acknowledge the support of the National Department of Health and all planners,  
488 stakeholders and decision-makers who made use of these data systems and analyses to respond to  
489 the COVID-19 epidemic in South Africa. A large number of colleagues within the National Institute of  
490 Communicable Diseases, the Ministerial Advisory Committee on COVID-19, the Clinton Health Access  
491 Initiative, provincial and national Departments of Health, and National Treasury alerted us to policy-  
492 relevant questions, assisted the development of our models by providing data, discussing details of  
493 model structure, and reviewing assumptions and results. We are especially grateful to decision  
494 makers and planners at all levels of the health system who continuously used our outputs in the  
495 management of COVID-19.

496 **FUNDING STATEMENT**

497 The work of GMR and LJ on the SACMC was supported by USAID South Africa (EVIDENCE) and USAID  
498 (EQUIP). SPS, RAH and the development of the SACMC dashboards are funded by the Wellcome  
499 Trust (GN: 2114236/Z/18Z) and the Clinton Health Access Initiative. JRCP is supported by the  
500 Department of Science and Innovation and the National Research Foundation. Any opinion, finding,  
501 and conclusion or recommendation expressed in this material is that of the authors, and the NRF  
502 does not accept any liability in this regard. The SACMC's work is also supported by the Bill & Melinda  
503 Gates Foundation under Investment INV-035464. The views and opinions expressed in this report do  
504 however not necessarily reflect the positions or policies of the Bill & Melinda Gates Foundation.

505

506

507 **REFERENCES**

- 508 [1] Department of Health, Republic of South Africa: COVID-19 Online Resource & News Portal.  
509 Available under <https://sacoronavirus.co.za>. Last accessed 12 Oct 2021
- 510 [2] South African Government: COVID-19 / Novel Coronavirus. About alert system. Available under  
511 <https://www.gov.za/covid-19/about/about-alert-system>. Last accessed 12 Oct 2021
- 512 [3] Silal S, Meyer-Rath G, Jamieson L, Nichols B, Norman J, Hounsell R, Mayet N, Kagoro F, Moultrie  
513 H, Pulliam J: The National COVID-19 Epi Model (NCEM): Estimating cases and deaths in South Africa.  
514 Forthcoming
- 515 [4] Jamieson L, Van Schalkwyk C, Nichols B, Meyer-Rath G, Silal S, Pulliam J, Jassat W, Blumberg L,  
516 Moultrie H: Differential in-hospital mortality over time: informing hospital pathways for modelling  
517 COVID-19 in South Africa. Forthcoming
- 518 [5] South African National Department of Health. Plan of Action to Mitigate a COVID-19 Resurgence  
519 in South Africa. 2020 [unpublished]
- 520 [6] Statement by President Cyril Ramaphosa on further economic and social measures in response to  
521 the COVID-19 epidemic 21 April 2020. Available under  
522 [www.thepresidency.gov.za/newsletters/statement-president-cyril-ramaphosa-further-economic-](http://www.thepresidency.gov.za/newsletters/statement-president-cyril-ramaphosa-further-economic-and-social-measures-response-covid)  
523 [and-social-measures-response-covid](http://www.thepresidency.gov.za/newsletters/statement-president-cyril-ramaphosa-further-economic-and-social-measures-response-covid). Last accessed on 15 October 2021.
- 524 [7] Blecher M, Davén J, Meyer-Rath G, Silal S, Makrelou K, van Niekerk M: The South African  
525 government's COVID-19 response: protecting lives and livelihoods. In: South African Health Review  
526 2021. Durban: Health Systems Trust; 2022.  
527 [https://www.hst.org.za/publications/South%20African%20Health%20Reviews/Chapter1\\_SAHR21\\_0](https://www.hst.org.za/publications/South%20African%20Health%20Reviews/Chapter1_SAHR21_04022022_OD.pdf)  
528 [4022022\\_OD.pdf](https://www.hst.org.za/publications/South%20African%20Health%20Reviews/Chapter1_SAHR21_04022022_OD.pdf)
- 529 [8] Inui S, Fujikawa A, Jitsu M, Kunishima N, Watanabe S, Suzuki Y, et al. Chest CT Findings in Cases  
530 from the Cruise Ship "Diamond Princess" with Coronavirus Disease 2019 (COVID-19). Radiol  
531 Cardiothorac Imaging [Internet]. 2020 Apr 1 [cited 2020 Mar 23];2(2):e200110. Available from:  
532 <http://pubs.rsna.org/doi/10.1148/ryct.2020200110>
- 533 [9] Sutton, D., Fuchs, K., D'Alton, M. and Goffman, D., 2020. Universal screening for SARS-CoV-2 in  
534 women admitted for delivery. New England Journal of Medicine.
- 535 [10] Day, M., 2020. Covid-19: four fifths of cases are asymptomatic, China figures indicate.
- 536 [11] Ing AJ, Cocks C, Green JP. COVID-19: in the footsteps of Ernest Shackleton. Thorax [Internet].  
537 2020 May 27 [cited 2020 Jun 4]. Available from: <http://www.ncbi.nlm.nih.gov/pubmed/32461231>
- 538 [12] Li R, Pei S, Chen B, Song Y, Zhang T, Yang W, Shaman J. Substantial undocumented infection  
539 facilitates the rapid dissemination of novel coronavirus (SARS-CoV-2). Science. 2020;368(6490):489-  
540 493.
- 541 [13] Furukawa NW, Brooks JT, Sobel J. Evidence Supporting Transmission of Severe Acute  
542 Respiratory Syndrome Coronavirus 2 While Presymptomatic or Asymptomatic. Emerg Infect Dis.  
543 2020;26(7):6059.
- 544 [14] Zhou R, Li F, Chen F, Liu H, Zheng J, Lei C, et al. Viral dynamics in asymptomatic patients with  
545 COVID-19. Int J Infect Dis [Internet]. 2020;96:288–90. Available from:  
546 <https://doi.org/10.1016/j.ijid.2020.05.030>

- 547 [15] National Institute of Communicable Diseases. Daily Hospital Surveillance (DATCOV) Report  
548 [Internet]. 2022. Available from: <https://www.nicd.ac.za/diseases-a-z-index/disease-index-covid-19/surveillance-reports/daily-hospital-surveillance-datcov-report/> (last accessed 27 May 2022)  
549
- 550 [16] Jassat W, Mudara C, Ozougwu L, Tempia S, Blumberg L, Davies MA, Pillay Y, Carter T, Morewane  
551 R, Wolmarans M, von Gottberg A, Bhiman JN, Walaza S, Cohen C; DATCOV author group. Difference  
552 in mortality among individuals admitted to hospital with COVID-19 during the first and second waves  
553 in South Africa: a cohort study. *Lancet Glob Health*. 2021 Sep;9(9):e1216-e1225. doi: 10.1016/S2214-  
554 109X(21)00289-8.
- 555 [17] Verity R, Okell LC, Dorigatti I, Winskill P, Whittaker C, Imai N, et al. Estimates of the severity of  
556 COVID-19 disease. *Lancet Infect Dis*. 2020 Jun;20(6):669-677. doi: 10.1016/S1473-3099(20)30243-7
- 557 [18] World Health Organization. Report of the WHO-China Joint Mission on Coronavirus Disease  
558 2019 (COVID-19) [Internet]. 2020 [cited 2020 Mar 14]. Available from:  
559 [https://www.who.int/docs/default-source/coronaviruse/who-china-joint-mission-on-covid-19-final-](https://www.who.int/docs/default-source/coronaviruse/who-china-joint-mission-on-covid-19-final-report.pdf)  
560 [report.pdf](https://www.who.int/docs/default-source/coronaviruse/who-china-joint-mission-on-covid-19-final-report.pdf)
- 561 [19] Huang C, Wang Y, Li X, Ren L, Zhao J, Hu Y, et al. Clinical features of patients infected with 2019  
562 novel coronavirus in Wuhan, China. *www.thelancet.com* [Internet]. 2020 [cited 2020 Mar  
563 14];395:497. Available from: <https://isaric.tghn.org/protocols/>
- 564 [20] Gaythorpe K, Imai N, Cuomo-Dannenburg G, Baguelin M, Bhatia S, Boonyasiri A, et al. Report 8:  
565 Symptom progression of COVID-19 [Internet]. 2020 Mar [cited 2020 Mar 18]. Available from:  
566 <https://doi.org/10.25561/77344>
- 567 [21] Zhou F, Yu T, Du R, Fan G, Liu Y, Liu Z, et al. Clinical course and risk factors for mortality of adult  
568 inpatients with COVID-19 in Wuhan, China: a retrospective cohort study. *Lancet* [Internet]. 2020 Mar  
569 [cited 2020 Mar 14];0(0). Available from:  
570 <https://linkinghub.elsevier.com/retrieve/pii/S0140673620305663>
- 571 [22] Tindale L, Coombe M, Stockdale JE, Garlock E, Lau WYV, Saraswat M, et al. Transmission interval  
572 estimates suggest pre-symptomatic spread of COVID-19. *medRxiv*. 2020 Mar  
573 6;2020.03.03.20029983.
- 574 [23] Wang D, Hu B, Hu C, Zhu F, Liu X, Zhang J, et al. Clinical Characteristics of 138 Hospitalized  
575 Patients with 2019 Novel Coronavirus-Infected Pneumonia in Wuhan, China. *JAMA - J Am Med*  
576 *Assoc*. 2020 Mar 17;323(11):1061–9.
- 577 [24] Peter A, Huisman JS, Sonja L, Bouman JA, Althaus CL, Regoes RR, Sebastian B. COVID-19  
578 infectivity profile correction. *Swiss Medical Weekly* 2020 150
- 579 [25] Tindale L, Coombe M, Stockdale JE, Garlock E, Lau WYV, Saraswat M, et al. Transmission interval  
580 estimates suggest pre-symptomatic spread of COVID-19. *medRxiv* [Internet]. 2020 Mar  
581 6;2020.03.03.20029983. Available from:  
582 <https://www.medrxiv.org/content/10.1101/2020.03.03.20029983v1>
- 583 [26] Nie X, Fan L, Mu G, Tan Q, Wang M, Xie Y, et al. Epidemiological Characteristics and Incubation  
584 Period of 7015 Confirmed Cases With Coronavirus Disease 2019 Outside Hubei Province in China. *J*  
585 *Infect Dis* [Internet]. 2020 [cited 2020 Jun 10];1–8. Available from:  
586 <https://academic.oup.com/jid/advance-article-abstract/doi/10.1093/infdis/jiaa211/5825699>

- 587 [27] Linton NM, Kobayashi T, Yang Y, Hayashi K, Akhmetzhanov AR, Jung S, et al. Incubation Period  
588 and Other Epidemiological Characteristics of 2019 Novel Coronavirus Infections with Right  
589 Truncation: A Statistical Analysis of Publicly Available Case Data. *J Clin Med* [Internet]. 2020 Feb 17  
590 [cited 2020 Jun 10];9(2):538. Available from: <https://www.mdpi.com/2077-0383/9/2/538>
- 591 [28] Thompson RN, Lovell-Read FA, Obolski U. Time from Symptom Onset to Hospitalisation of  
592 Coronavirus Disease 2019 (COVID-19) Cases: Implications for the Proportion of Transmissions from  
593 Infectors with Few Symptoms. *J Clin Med* [Internet]. 2020 May 1 [cited 2020 Jun 10];9(5):1297.  
594 Available from: <https://www.mdpi.com/2077-0383/9/5/1297>
- 595 [29] Backer JA, Klinkenberg D, Wallinga J. Incubation period of 2019 novel coronavirus (2019- nCoV)  
596 infections among travellers from Wuhan, China, 20 - 28 January 2020. Vol. 25, *Eurosurveillance*.  
597 European Centre for Disease Prevention and Control (ECDC); 2020. Available from:  
598 <https://www.ncbi.nlm.nih.gov/pmc/articles/PMC7014672/>
- 599 [30] Jing Q, You C, Lin Q, Hu T, Yu S, Zhou X-H. Estimation of incubation period distribution of COVID-  
600 19 using disease onset forward time: a novel cross-sectional and forward follow-up study. *medRxiv*  
601 [Internet]. 2020 Mar 10;2020.03.06.20032417. Available from:  
602 <https://www.ncbi.nlm.nih.gov/pmc/articles/PMC7217033/>
- 603 [31] Lauer SA, Grantz KH, Bi Q, Jones FK, Zheng Q, Meredith HR, et al. The incubation period of  
604 coronavirus disease 2019 (CoVID-19) from publicly reported confirmed cases: Estimation and  
605 application. *Ann Intern Med* [Internet]. 2020 May 5;172(9):577–82. Available from:  
606 <https://www.acpjournals.org/doi/10.7326/M20-0504>
- 607 [32] Ganyani T, Kremer C, Chen D, Torneri A, Faes C, Wallinga J, et al. Estimating the generation  
608 interval for coronavirus disease (COVID-19) based on symptom onset data, March 2020.  
609 *Eurosurveillance* [Internet]. 2020 Apr 30;25(17). Available from:  
610 <https://www.eurosurveillance.org/content/10.2807/1560-7917.ES.2020.25.17.2000257>
- 611 [33] Nishiura H, Linton NM, Akhmetzhanov AR. Serial interval of novel coronavirus (COVID-19)  
612 infections. *Int J Infect Dis* [Internet]. 2020 Mar [cited 2020 Mar 16]; Available from:  
613 <https://linkinghub.elsevier.com/retrieve/pii/S1201971220301193>
- 614 [34] He X, Lau EHY, Wu P, Deng X, Wang J, Hao X, et al. Temporal dynamics in viral shedding and  
615 transmissibility of COVID-19. *Nat Med* [Internet]. 2020 May 1;26(5):672–5. Available from:  
616 <https://www.nature.com/articles/s41591-020-0869-5>
- 617 [35] He X, Lau EHY, Wu P, Deng X, Wang J, Hao X, et al. Temporal dynamics in viral shedding and  
618 transmissibility of COVID-19. *Nat Med* [Internet]. 2020 May 1;26(5):672–5. Available from:  
619 <https://www.nature.com/articles/s41591-020-0869-5>
- 620 [36] Wölfel R, Corman VM, Guggemos W, Seilmaier M, Zange S, Müller MA, et al. Virological  
621 assessment of hospitalized patients with COVID-2019. *Nature*. 2020 May 28;581(7809):465–9.  
622 Available from: <https://www.nature.com/articles/s41586-020-2196-x>
- 623 [37] Statistics South Africa. Mid-year district population estimates 2020 (unpublished)
- 624 [38] Data Science for Social Impact Research Group @ University of Pretoria, Coronavirus COVID- 19  
625 (2019-nCoV) Data Repository for South Africa. Available at: <https://github.com/dsfsi/covid19za>.
- 626 [39] Bradshaw D, et al., Report on weekly deaths in South Africa, 1 January -18 August 2020 (Week  
627 33). 2020, South African Medical Research Council Cape Town, South Africa.

- 628 [40] Tom Moultrie, Rob Dorrington, Ria Laubscher, Pam Groenewald, Debbie Bradshaw: Correlation  
629 of excess natural deaths with other measures of the Covid-19 pandemic in South Africa. South  
630 African Medical Research Council Burden of Disease Research Unit/ UCT Centre for Actuarial  
631 Research. 23 February 2021
- 632 [41] Edoka I, Fraser HL, Jamieson L, Meyer-Rath G, Mdewa W: Inpatient Care Costs of COVID-19 in  
633 South Africa's Public Healthcare System. Int J Health Policy Manag. doi: 10.34172/ijhpm.2021.24.  
634 (2021)
- 635 [42] Silal S.P., Pulliam J., Meyer-Rath G., Nichols, B., Jamieson Lise., Moultrie H. (2020) Estimating  
636 cases for COVID-19 in South Africa: Long term projections. National Institute for Communicable  
637 Diseases. Published on 19 May 2020 at: [https://www.nicd.ac.za/wp-](https://www.nicd.ac.za/wp-content/uploads/2020/05/SACovidModellingReport_NationalLongTermProjections_Final-1.pdf)  
638 [content/uploads/2020/05/SACovidModellingReport\\_NationalLongTermProjections\\_Final-1.pdf](https://www.nicd.ac.za/wp-content/uploads/2020/05/SACovidModellingReport_NationalLongTermProjections_Final-1.pdf)
- 639 [43] Silal S.P., Pulliam J., Meyer-Rath G., Nichols, B., Jamieson Lise., Moultrie H. (2020) Estimating  
640 cases for COVID-19 in South Africa: Long term provincial projections. National Institute for  
641 Communicable Diseases. Published on 19 May 2020 at: [https://www.nicd.ac.za/wp-](https://www.nicd.ac.za/wp-content/uploads/2020/05/SACovidModellingReport_ProvincialLongTermProjections_Final.pdf)  
642 [content/uploads/2020/05/SACovidModellingReport\\_ProvincialLongTermProjections\\_Final.pdf](https://www.nicd.ac.za/wp-content/uploads/2020/05/SACovidModellingReport_ProvincialLongTermProjections_Final.pdf)
- 643 [44] Silal S.P., Pulliam J., Meyer-Rath G., Nichols, B., Jamieson Lise., Moultrie H. (2020) Estimating  
644 cases for COVID-19 in South Africa: Assessment of alternate scenarios. National Institute for  
645 Communicable Diseases. Published on 5 September 2020 at: [https://www.nicd.ac.za/wp-](https://www.nicd.ac.za/wp-content/uploads/2020/11/SACovidModellingReport_LongTermProjections_050920_final.pdf)  
646 [content/uploads/2020/11/SACovidModellingReport\\_LongTermProjections\\_050920\\_final.pdf](https://www.nicd.ac.za/wp-content/uploads/2020/11/SACovidModellingReport_LongTermProjections_050920_final.pdf)
- 647 [45] South African COVID-19 Modelling Consortium: COVID-19 modelling update: Considerations for  
648 a potential third wave. Published on 29 April 2021 at: [https://www.nicd.ac.za/wp-](https://www.nicd.ac.za/wp-content/uploads/2021/07/SACMC-Third-wave-report-290421.pdf)  
649 [content/uploads/2021/07/SACMC-Third-wave-report-290421.pdf](https://www.nicd.ac.za/wp-content/uploads/2021/07/SACMC-Third-wave-report-290421.pdf)
- 650 [46] South African COVID-19 Modelling Consortium: COVID-19 modelling update: Considerations for  
651 the third wave, including the impact of the Delta variant of concern. Published on 14 July 2021 at:  
652 [https://www.nicd.ac.za/wp-content/uploads/2021/07/SACMC-Third-wave-report-inlcuding-Delta-](https://www.nicd.ac.za/wp-content/uploads/2021/07/SACMC-Third-wave-report-inlcuding-Delta-variant.pdf)  
653 [variant.pdf](https://www.nicd.ac.za/wp-content/uploads/2021/07/SACMC-Third-wave-report-inlcuding-Delta-variant.pdf).
- 654 [47] Petersen T. 25 ICU beds for Covid-19 patients 'already full' in Cape Town's largest hospital.  
655 News24. 2020 21 May 2020.
- 656 [48] Harding A. Coronavirus in South Africa: Inside Port Elizabeth's 'hospitals of horrors'. BBC News.  
657 2020 15 July 2020.
- 658 [49] Lepule T. Western Cape hospitals buckling under pressure of rising staff shortages. IOL. 2021 4  
659 July 2020.
- 660 [50] Pulliam JRC, van Schalkwyk C, Govender N, von Gottberg A, Cohen C, Groome MJ, et al:  
661 Increased risk of SARS-CoV-2 reinfection associated with emergence of Omicron in South  
662 AfricaScience376,eabn4947 (2022). DOI: 10.1126/science.abn4947
- 663 [51] Pearson CAB, Silal SP, Li MWZ, Dushoff J, Bolker BM, Abbott S, et al: Bounding the levels of  
664 transmissibility & immune evasion of the Omicron variant in South Africa. Preprint available at  
665 <https://www.medrxiv.org/content/10.1101/2021.12.19.21268038v1>
- 666
